# Supplementary material for: Augmented photocatalysis induced by 1T-MoS2 bridged 2D/2D MgIn2S4@1T/2H-MoS2 Z-scheme heterojunction: mechanistic insights into H2O2 and H2 evolution
Source: Royal Society of Chemistry journal article supplement (doi:10.1039/d3na00912b), 2024-01-01
Supplement: d3na00912b1.pdf [file d3na00912b1.pdf]

## Supporting Information

### **Augmented Photocatalysis Induced by 1T-MoS<sub>2</sub> Bridged 2D/2D MgIn<sub>2</sub>S<sub>4</sub>@1T/2H-MoS<sub>2</sub> Z-Scheme Heterojunction: Mechanistic Insights for H<sub>2</sub>O<sub>2</sub> and H<sub>2</sub> Evolution**

Sarmistha Das, Lopamudra Acharya, Lijarani Biswal and Kulamani Parida\*

*Centre for Nano Science and Nano Technology, Institute of Technical Education and  
Research, Siksha 'O' Anusandhan University, Bhubaneswar-751030*

*\*Corresponding author*

---

---

**\*Corresponding Author's Email:**

*[kulamaniparida@soa.ac.in](mailto:kulamaniparida@soa.ac.in)*

*[paridakulamani@yahoo.com](mailto:paridakulamani@yahoo.com)*

Tel. No.: +91-674-2351777 and Fax. +91-674-2350642

## **Characterization techniques:**

Diffraction (XRD) analysis was carried out using a Rigaku Miniflex X-ray diffractometer equipped with a monochromator and Cu K $\alpha$  radiation ( $\lambda = 0.154$  nm, 30 KV/50 mA). For identifying the chemical states of the samples, X-ray photoelectron spectroscopy (XPS) was conducted with a VG Microtech Multilab ESCA-3000 spectrometer, employing Mg-K $\alpha$  as the X-ray source. The morphological verification, including Field Emission Scanning Electron Microscopy (FESEM) was performed using a FEIN Quanta-400 FEG-SEM. The internal structure of the synthesized materials was analysed through High Resolution Transmission Electron Microscopy (HRTEM) using a JEOL-JEM-2100 transmission electron microscope. For determining the bandgap and absorbance characteristics, UV-Visible Diffuse Reflectance Spectroscopy (UV-Vis DRS) was conducted with a JASCO-V-750 UV-Vis spectrometer with BaSO<sub>4</sub> as the reference, covering a range of 200-800 nm. Photoluminescence (PL) spectra including excitation and emission spectra were examined using a JASCO FP-8300 fluorescence spectrometer, employing an excitation wavelength of 325 nm and a xenon (Xe) lamp as the light source. The average life span of exciton pairs was examined through TRPL analysis using life spec II EDINBURGH PHOTONICS instrument.

## **Photoelectrochemical measurements:**

A multi-channel Ivium potentiostat-galvanostat electrochemical workstation (IVIUM-N-STAT) was employed for photoelectrochemical measurements utilizing a three-electrode configuration consisting of a counter electrode (Pt foil), a reference electrode (Ag/AgCl) and a working electrode (fluorine-doped Tin oxide- FTO). 0.5 M H<sub>2</sub>SO<sub>4</sub> and 0.5 M Na<sub>2</sub>SO<sub>4</sub> aqueous solution was utilized as electrolytes for 1T/2H-MoS<sub>2</sub> and MIS. To prepare the working electrode, a mixture containing 10 mg of sample, 0.7 ml of ethanol and 1% nafion (20  $\mu$ l) was coated onto the conducting surface of the FTO by drop-casting method. The FTO-coated electrode was then dried in an oven at 90 °C for 12 hours. The light source was provided by 300 W Xenon lamp equipped with a 400 nm cut-off filter.

## **Photocatalytic H<sub>2</sub>O<sub>2</sub> production experiment:**

The photocatalytic generation of H<sub>2</sub>O<sub>2</sub> from pristine 1T/2H-MoS<sub>2</sub>, MIS and MMoS<sub>2</sub>-x photocatalysts was conducted under visible light exposure in an oxygen-saturated environment. Initially, 0.02 grams of the photocatalysts were dispersed in a mixed solution of 19 mL DI water and 1 mL ethanol through 10 min of ultrasonication to ensure complete dispersion.

Subsequently, the sample was exposed to O<sub>2</sub> gas for 30 min before being irradiated to 250 W visible light to create an oxygen equilibrated environment. After 2 hours of light exposure, the photocatalysts were collected from the solution by centrifugation and filtration. Then 1 mL of the resulting solution was mixed with 2 mL of KI (0.1 M) solution, followed by the addition of 0.05 mL of ammonium molybdate (0.01 M) solution to yield a light yellow colour. Then finally, the concentration of H<sub>2</sub>O<sub>2</sub> was determined by measuring the absorbance at a wavelength of 350 nm using an UV-Vis spectrophotometer.

### **Photocatalytic H<sub>2</sub> evolution experiment:**

The photocatalytic water splitting reaction was performed inside a pyrex quartz glass photoreactor connected to a 150 W Xenon lamp emitting light with a wavelength greater than 420 nm. For the experiment, 20 mg of photocatalysts (1T/2H-MoS<sub>2</sub>, MIS, MMoS<sub>2</sub>-x composites) were dispersed in 20 mL of a 10% methanol solution (used as a sacrificial agent). The suspension was continuously stirred to prevent the catalysts from settling at the bottom of the reactor. Prior to exposing the system to light, the reactor's atmosphere was rendered inert by purging it with N<sub>2</sub> gas multiple times. After 1 hour of light exposure, the hydrogen gas produced was collected through water displacement method. The quantity of H<sub>2</sub> evolution was quantified using a GC-7890B (Agilent technology) equipped with a thermal conductivity detector (TCD) and a 5 Å molecular sieve packed column.

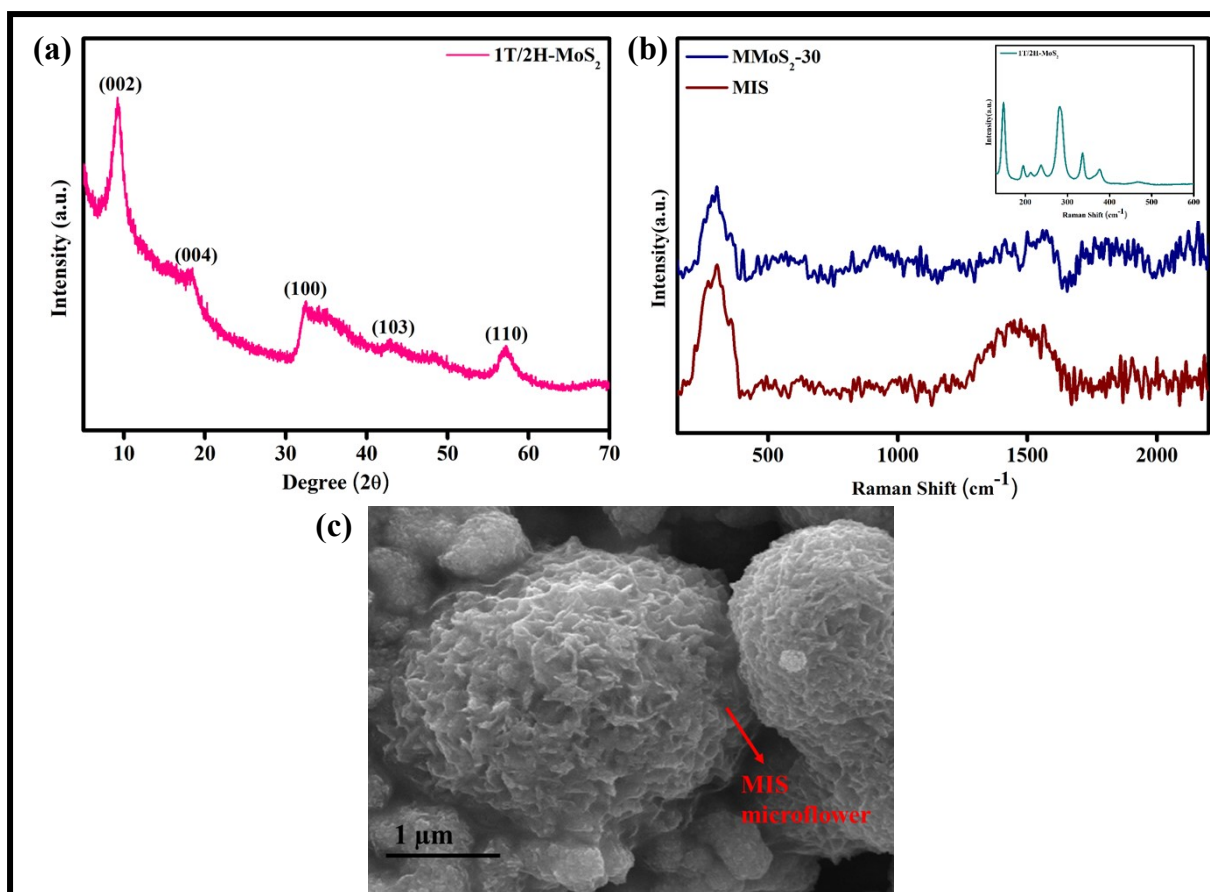

**Figure S1.** (a) XRD pattern of neat 1T/2H-MoS<sub>2</sub> (b) Raman spectra of neat MIS and MMoS<sub>2</sub>-30 (Inset: Raman spectra of neat 1T/2H-MoS<sub>2</sub>) and (c) FESEM image of MIS microflower.

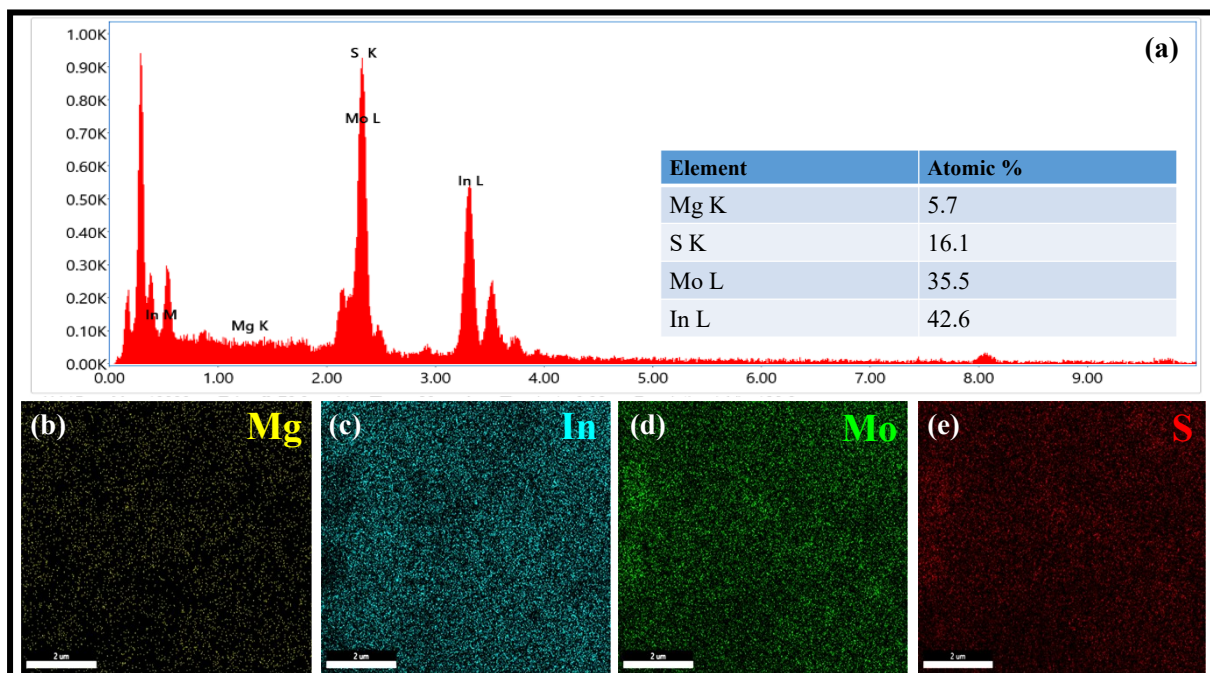

**Figure S2.** (a) EDX spectra of MMoS<sub>2</sub>-30 composite and (b) Elemental mapping of Mg, In, Mo and S elements for MMoS<sub>2</sub>-30.

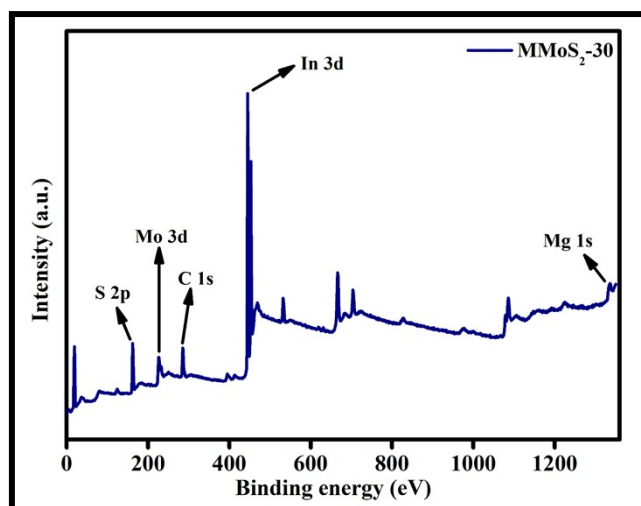

**Figure S3.** XPS survey spectra of MMoS<sub>2</sub>-30 photocatalyst.

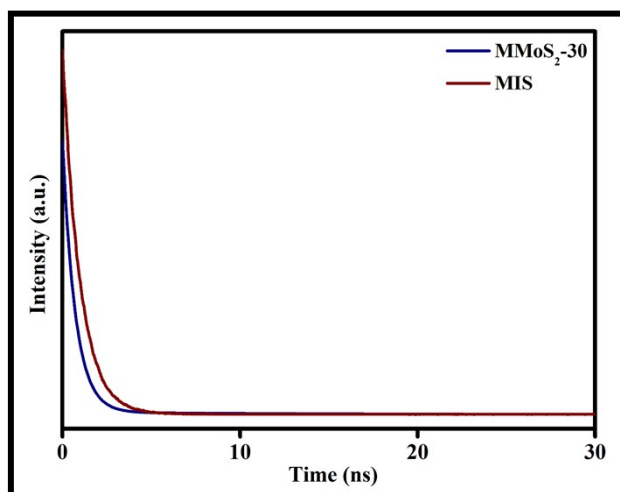

**Figure S4.** TRPL plot for neat MIS and MMoS<sub>2</sub>-30 composite.

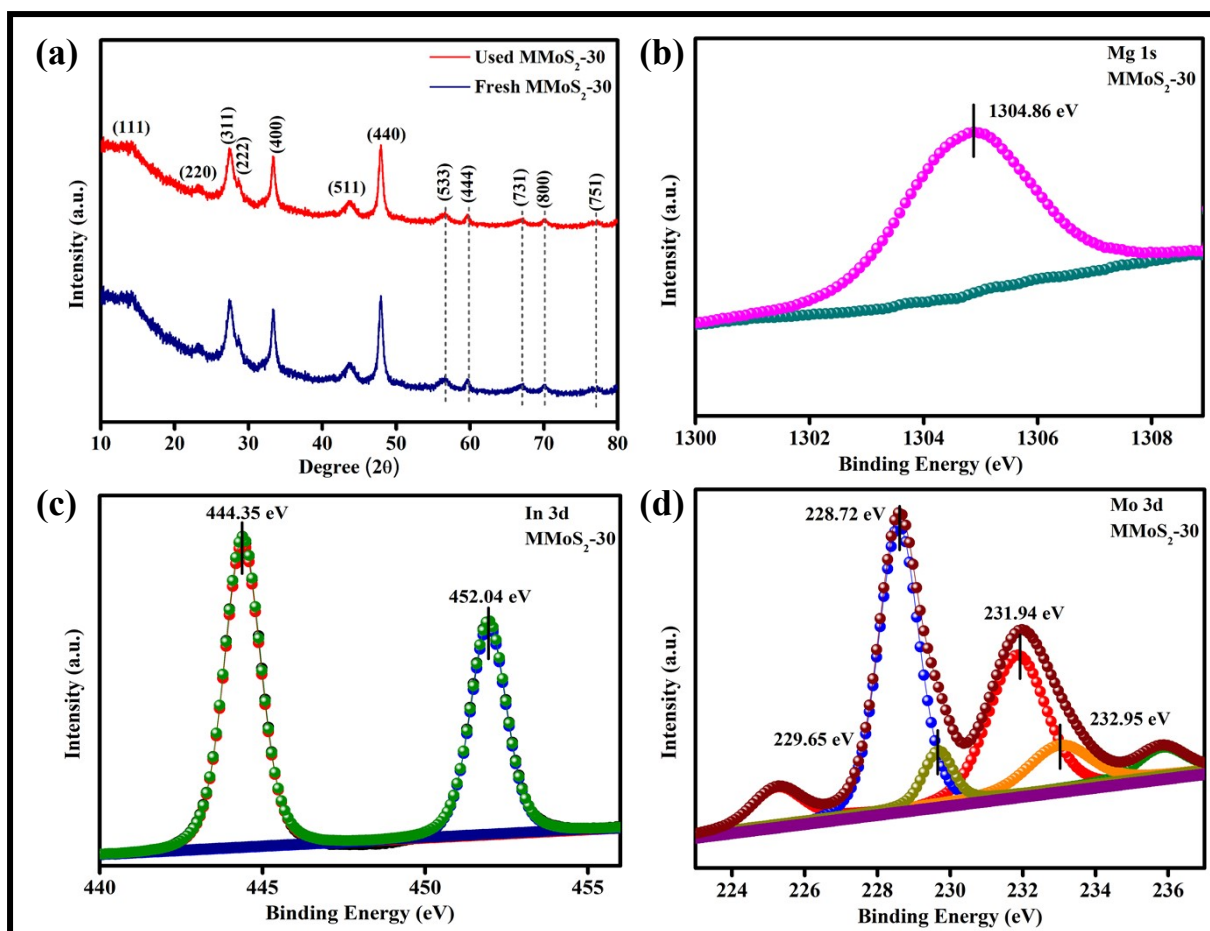

**Figure S5.** (a) XRD pattern for fresh and used MMoS<sub>2</sub>-30 photocatalyst. After use XPS spectra for (b) Mg (c) In and (d) Mo in MMoS<sub>2</sub>-30.

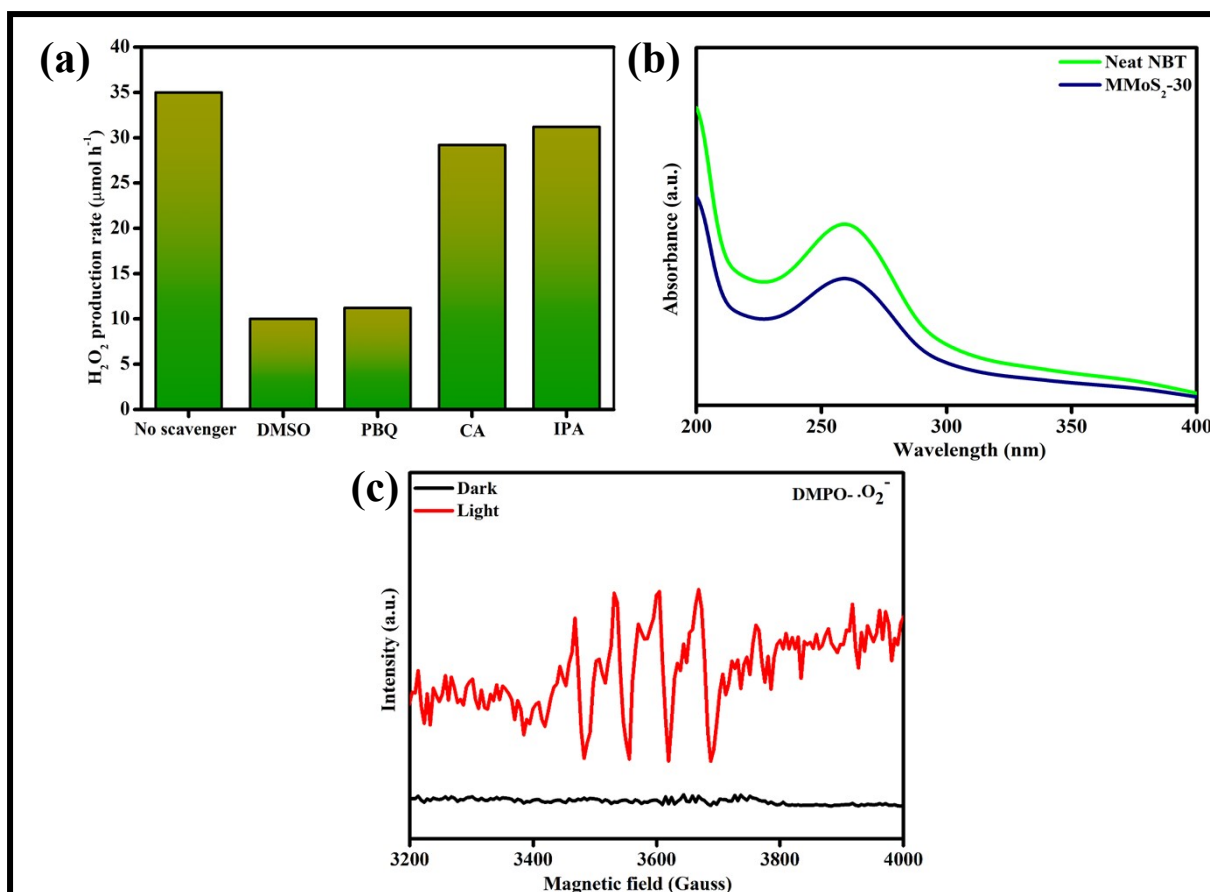

**Figure S6.** (a) Scavenger test for MMoS<sub>2</sub>-30 towards photocatalytic H<sub>2</sub>O<sub>2</sub> evolution. (b) NBT experiment for •O<sub>2</sub><sup>-</sup> and (c) EPR spectra for •O<sub>2</sub><sup>-</sup> in dark and light conditions.

**Table S1.** Comparative study of photocatalytic H<sub>2</sub> evolution

| Sl.No. | Material                                                        | Amount of catalyst (mg) | Sacrificial agent                      | Light source  | Rate of H <sub>2</sub> evolution            | Reference |
|--------|-----------------------------------------------------------------|-------------------------|----------------------------------------|---------------|---------------------------------------------|-----------|
| 1.     | 1T/2H-MoS <sub>2</sub> /O-g-C <sub>3</sub> N <sub>4</sub>       | 10                      | Triethanolamine (TEOA)                 | 300 W Xe lamp | 1841.72 μmolg <sup>-1</sup> h <sup>-1</sup> | 1         |
| 2.     | 1T/2H-MoS <sub>2</sub> @CNT/CNU                                 | 40                      | OA solution                            | 300 W Xe lamp | 1563.32 μmolg <sup>-1</sup> h <sup>-1</sup> | 2         |
| 3.     | 1T-MoS <sub>2</sub> /Au/S-doped g-C <sub>3</sub> N <sub>4</sub> | 15                      | Methanol                               | 300 W Xe lamp | 4708.3 μmolg <sup>-1</sup> h <sup>-1</sup>  | 3         |
| 4.     | CN/MoS <sub>2-x</sub>                                           | 25                      | Triethanolamine (TEOA)                 | 300 W Xe lamp | 441.3 μmolg <sup>-1</sup> h <sup>-1</sup>   | 4         |
| 5.     | MoS <sub>2</sub> @Ag <sub>2</sub> S                             | 10                      | 0.1M Na <sub>2</sub> S, 3M NaCl, 0.04M | 300 W Xe lamp | 3516 μmolg <sup>-1</sup> h <sup>-1</sup>    | 5         |

|    |                                                   |    |                                                                   |               |                                          |              |
|----|---------------------------------------------------|----|-------------------------------------------------------------------|---------------|------------------------------------------|--------------|
|    |                                                   |    | Na <sub>2</sub> SO <sub>3</sub>                                   |               |                                          |              |
| 6. | NH <sub>2</sub> -MIL-125(Ti)/O,P-MoS <sub>2</sub> | 15 | Acetonitrile, TEOA, DI                                            | LED light     | 339.3 $\mu\text{molg}^{-1}\text{h}^{-1}$ | 6            |
| 7. | MIS/e-BCN                                         | 20 | Methanol                                                          | Visible light | 330 $\mu\text{molg}^{-1}\text{h}^{-1}$   | 7            |
| 8. | MMoS <sub>2</sub> -30                             | 20 | 0.35M Na <sub>2</sub> S and 0.25M Na <sub>2</sub> SO <sub>3</sub> | Visible light | 370 $\mu\text{molg}^{-1}\text{h}^{-1}$   | Current work |

**Table S2.** Comparative study of photocatalytic H<sub>2</sub>O<sub>2</sub> production

| Sl.No. | Photocatalysts                                           | Light source             | Time duration | Rate of H <sub>2</sub> O <sub>2</sub> production | Reference    |
|--------|----------------------------------------------------------|--------------------------|---------------|--------------------------------------------------|--------------|
| 1.     | MoS <sub>2-v</sub> /TCN                                  | 300 W Xe lamp            | 60 min        | 1879 $\mu\text{molg}^{-1}\text{h}^{-1}$          | 8            |
| 2.     | MoS <sub>2</sub> /FeS <sub>2</sub>                       | 300 W Xe lamp            | 60 min        | 1.5 $\text{mmol g}^{-1}\text{h}^{-1}$            | 9            |
| 3.     | 1T-MoS <sub>2</sub> /g-C <sub>3</sub> N <sub>4</sub>     | Simulated solar (AM 1.5) | 60 min        | 42 $\mu\text{M}$                                 | 10           |
| 4.     | Fe <sub>2</sub> O <sub>3</sub> @C@1T/2H-MoS <sub>2</sub> | Visible light            | -             | 1575 $\mu\text{molg}^{-1}\text{h}^{-1}$          | 11           |
| 5.     | MMoS <sub>2</sub> -30                                    | Visible light            | 120 min       | 35 $\mu\text{molh}^{-1}$                         | Current work |

## References

1. H. Xu, J. Yi, X. She, Q. Liu, L. Song, S. Chen, Y. Yang, Y. Song, R. Vajtai, J. Lou and H. Li, *Appl. Catal. B: Environ.*, 2018, **220**, 379-385.
2. C. Sun, F. Li, J. Ren, J. Wu, G. Wang and L. Chen, *Appl. Surf. Sci.*, 2021, **569**, 151072.
3. D. Li, G. Zeng, Y. Wu, Z. Zhou, W. Guo and C. Li, *Int. J. Hydrog. Energy.*, 2023.
4. Y. Xu, J. Ouyang, L. Zhang, H. Long, Y. Song and Y. Cui, *Chem. Phys. Lett.*, 2023, **814**, 140331.
5. C. J. Chang, Z. T. Tsai, K. S. Lin and Y. H. Nian, *J. Photochem. Photobiol. A.*, 2023, **445**, 115027.



6. L. Wang, Y. Hu, J. Xu, Z. Huang, H. Lao, X. Xu, J. Xu, H. Tang, R. Yuan, Z. Wang and Q. Liu, *Int. J. Hydrog. Energy.*, 2023, **48**, 16987-16999.
7. L. Acharya, G. Swain, B. P. Mishra, R. Acharya and K. Parida, *ACS Appl. Energy Mater.*, 2022, **5**, 2838-2852.
8. G. Jiang, X. You, B. An, B. Zhu, F. Liu, X. Duan, Y. Wang and R. Zhao, *Appl. Surf. Sci.*, 2023, **618**, 156656.
9. Y. Yang, H. Yu, M. Wu, T. Zhao, Y. Guan, D. Yang, Y. Zhu, Y. Zhang, S. Ma, J. Wu and L. Liu, *Appl. Catal. B: Environ.*, 2023, **325**, 122307.
10. X. Hu, X. Zeng, Y. Liu, J. Lu, S. Yuan, Y. Yin, J. Hu, D. T. McCarthy, and X. Zhang, *Appl. Catal. B: Environ.*, 2020, **268**, 118466.
11. Y. Yang, Q. Wang, X. Zhang, X. Deng, Y. Guan, M. Wu, L. Liu, J. Wu, T. Yao and Y. Yin, *J. Mater. Chem. A.*, 2023, **11**, 1991-2001.
